# Supplementary material for: Function and molecular regulation of DWARF1 as a C-24 reductase in brassinosteroid biosynthesis in Arabidopsis
Source: PubMed Central journal article supplement (PMC6018864; doi:10.1093/jxb/ery038), 2018-02-08
Supplement: ery038_suppl_supplementary_figures_s1_s6_table_s1.pdf [file ery038_suppl_supplementary_figures_s1_s6_table_s1.pdf]

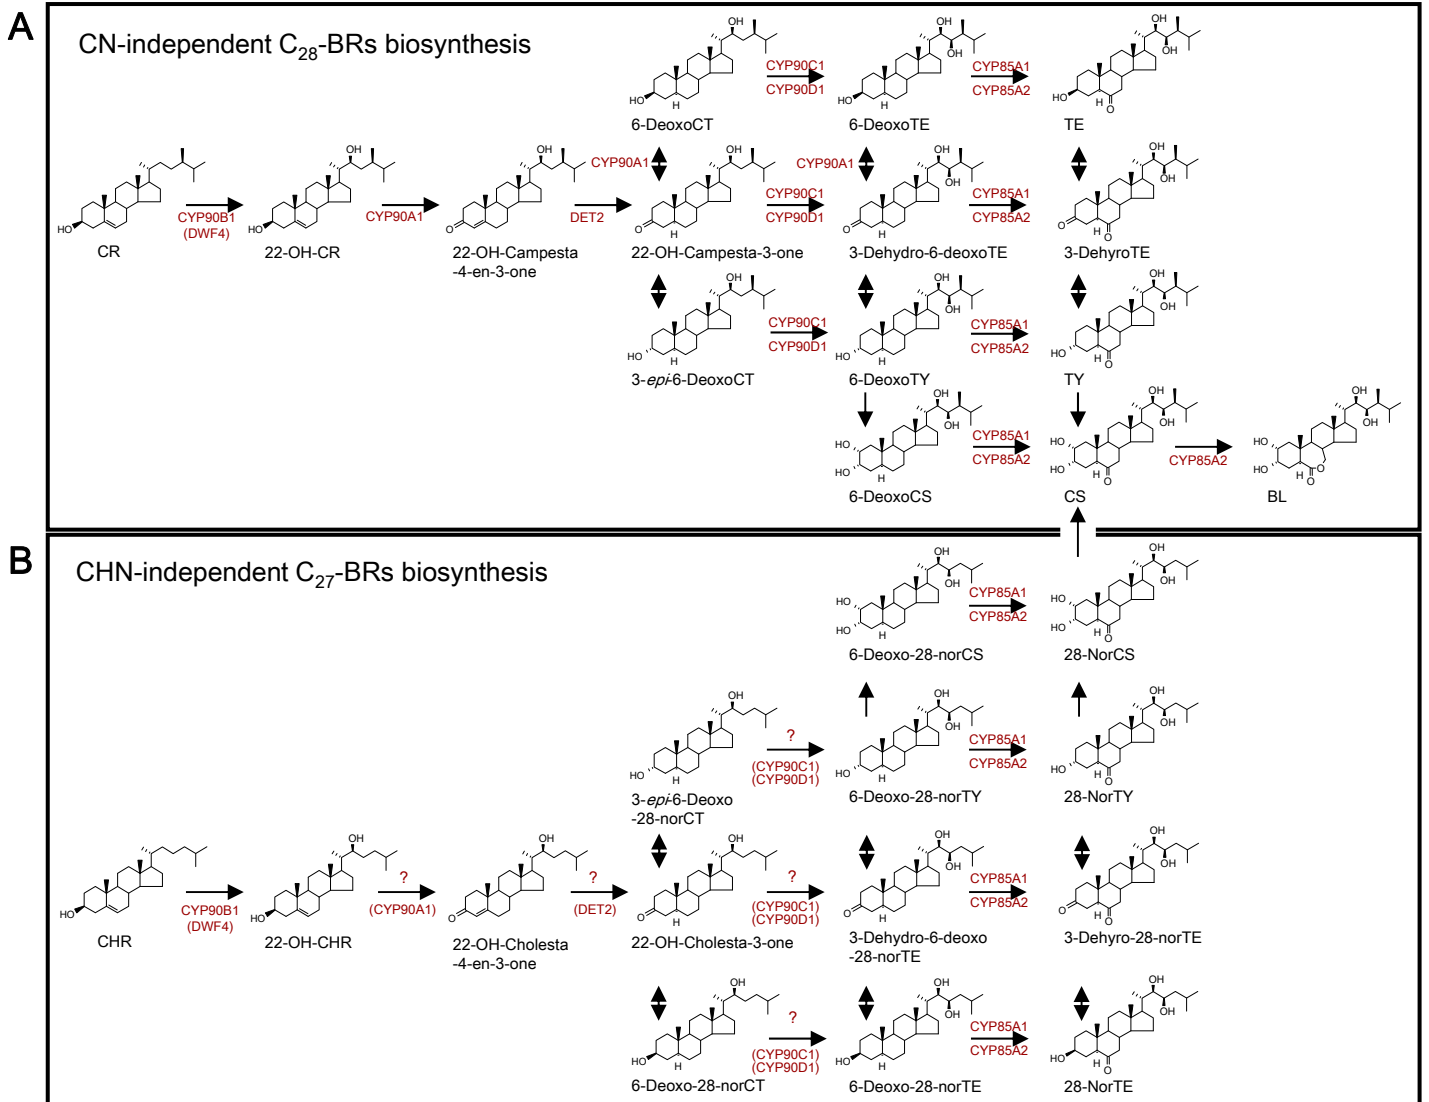

**Supplementary Fig. S1** CN-independent (A) and CHN-independent (B) pathways for biosynthesis of BRs in Arabidopsis

**A** Fig. 2B

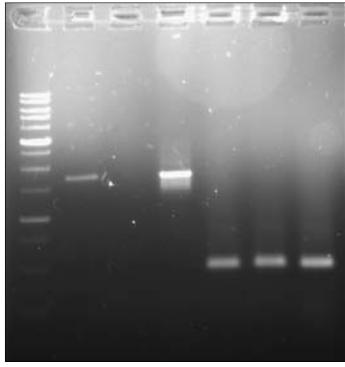

**B** Fig. 6E

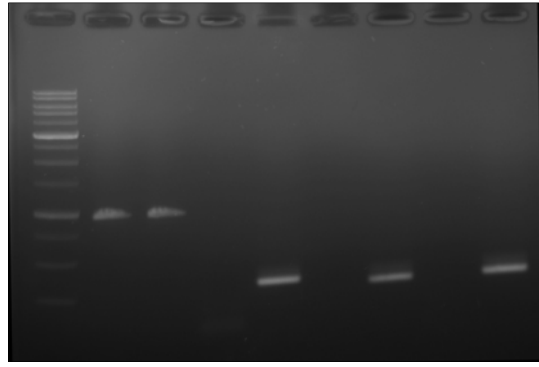

**C** Fig. 6F

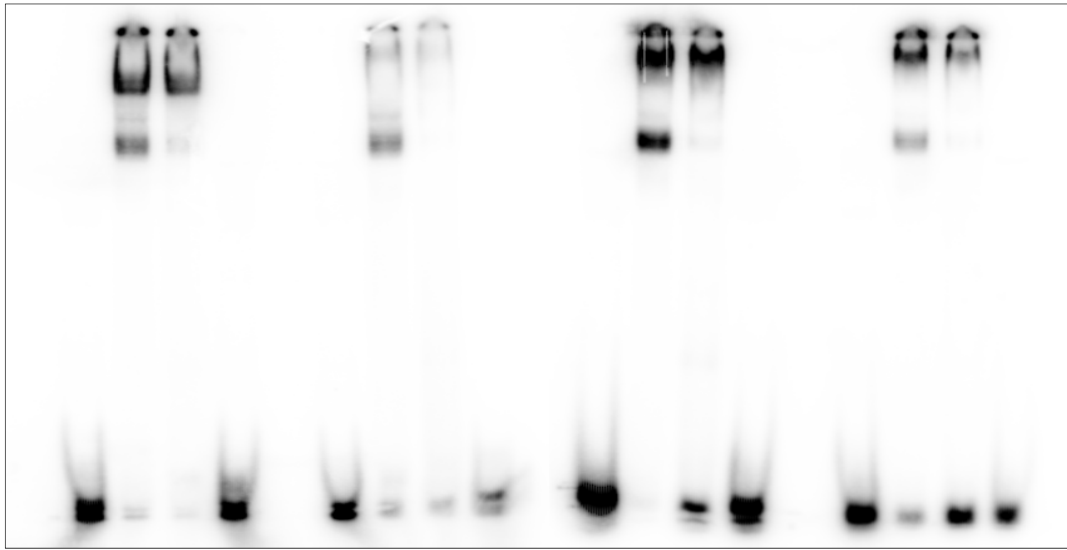

**D** Fig. 6G

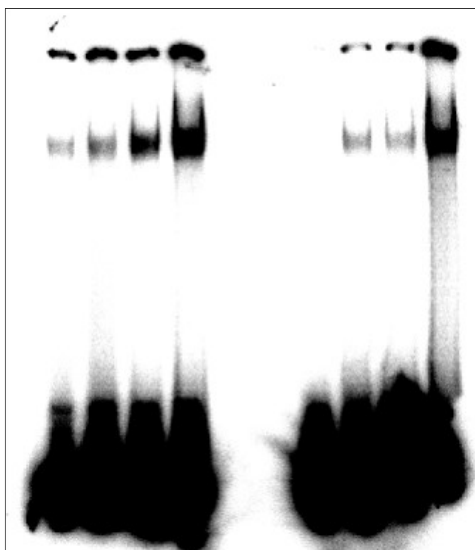

**E** Supplementary Fig. S4

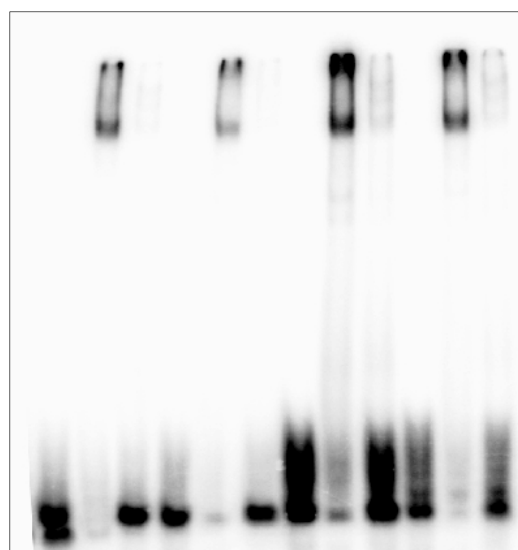

**Supplementary Fig. S2** Original images for all of the gels and blots presented in this report. (A) Fig.2B, (B) Fig. 6E, (C) Fig. 6F, (D) Fig. 6G. (E) Supplementary Fig.S5

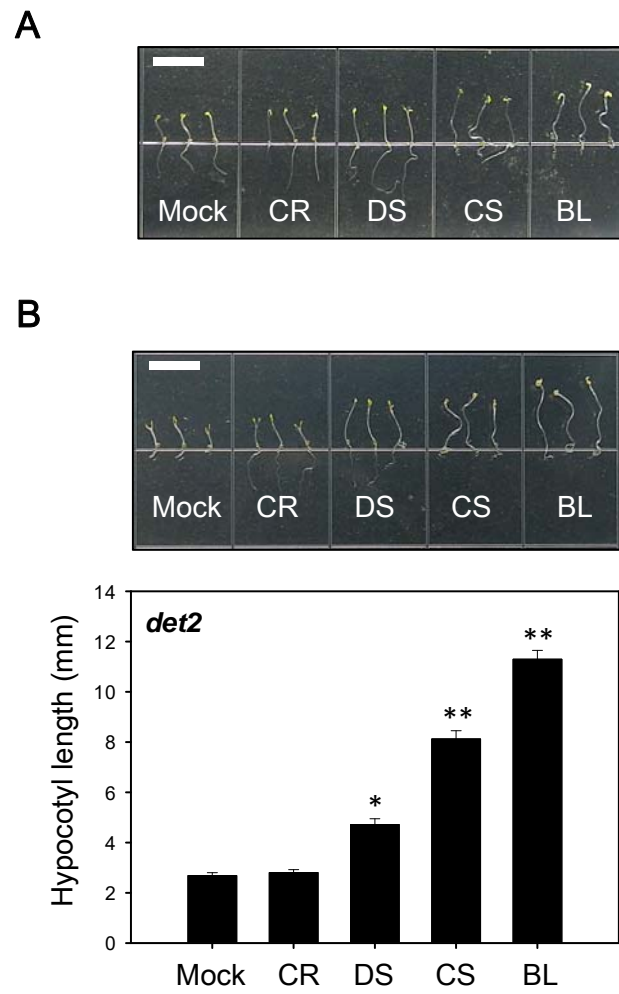

**Supplementary Fig. S3** Hypocotyl length assay in 5-day-old seedlings of *dwf1* (A) and *det2* (B) mutant after application of 0.1  $\mu$ M CR, DS, CS and BL.

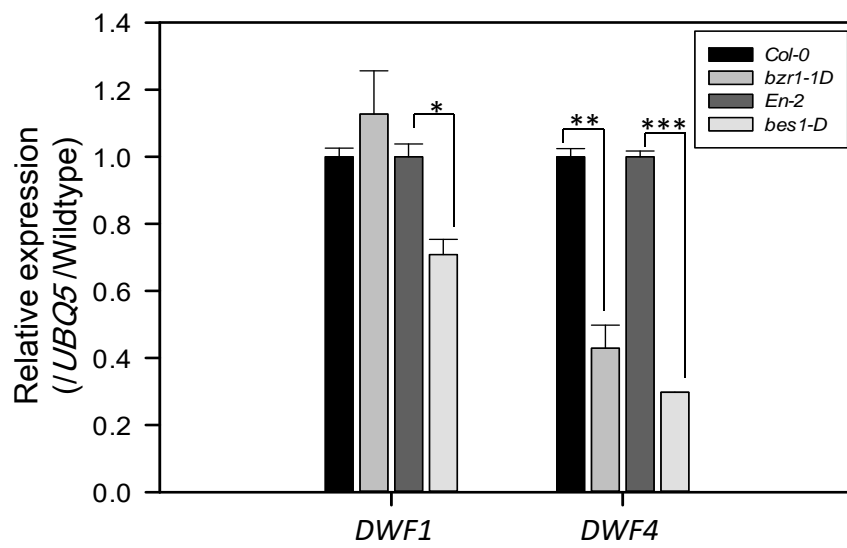

**Supplementary Fig. S4** Expression level of *DWF1* and *DWF4* in BR-dominant mutants *bes1-D* and *bsr1-1D*.

| E-box      | 1/2 |   |   | 3 |   |   | 5/6 |   |   | 4 |   |   |
|------------|-----|---|---|---|---|---|-----|---|---|---|---|---|
| Hot probe  | +   | + | + | + | + | + | +   | + | + | + | + | + |
| Cold probe | -   | - | + | - | - | + | -   | - | + | - | - | + |
| MBP        | +   | - | - | + | - | - | +   | - | - | + | - | - |
| MBP-BES1   | -   | + | + | - | + | + | -   | + | + | - | + | + |

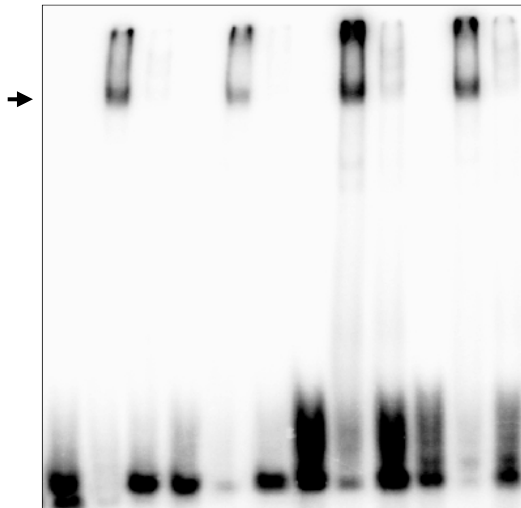

**Supplementary Fig. S5** Competitive EMSA results for binding of MBP-BES1 to *DWF1* promoter in vitro.

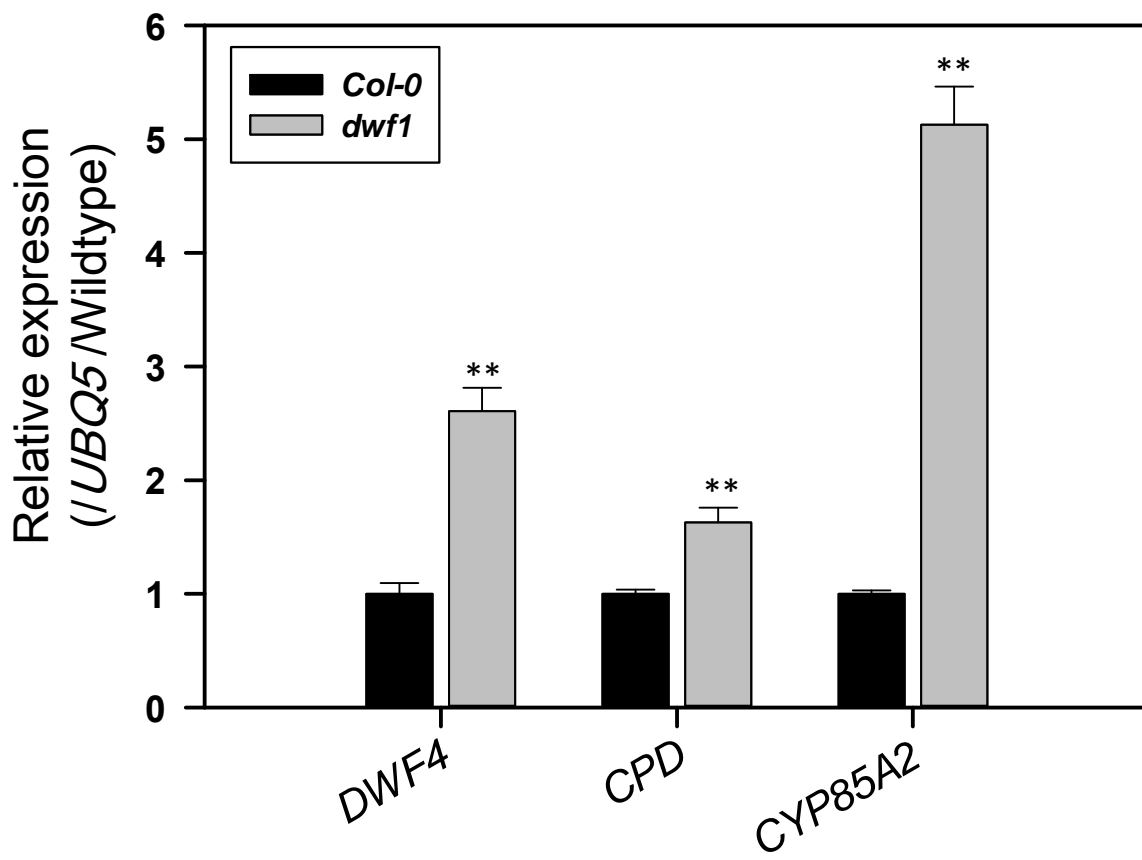

**Supplementary Fig. S6** Alternation of expression of BR biosynthetic genes in *dwf1* and Wild-type (Col-0).

**Supplementary table S1.** Sequences of DNA probes and primers used in this study

| Name                    | Sequence |                            | Usage        |
|-------------------------|----------|----------------------------|--------------|
| SAUR-AC1-c              | Forward  | GCAGAAAGGAGTCAGTGATG       | ChIP         |
|                         | Reverse  | AAGACAGGACCACATGATTTG      |              |
| DWF1 E-box1/2-c         | Forward  | GTGTAGATCTAAAGATTATAA      |              |
|                         | Reverse  | GTCAACAAGGCCTAAGAAGT       |              |
| DWF1 E-box5/6-c         | Forward  | TGTCTAATTAAGCTCTAGGTTCTGA  |              |
|                         | Reverse  | TCGCAATTAATAAATTCGATGT     |              |
| DWF1 E-box1/2-e (WT)    | Forward  | TTTTTCTGATACACATGTGTGTATA  | EMSA         |
|                         | Reverse  | TTTTTATAACACATGTGTATCAG    |              |
| DWF1 E-box3 (WT)        | Forward  | TTTTTATAAAGACAAATGCTCTCAC  |              |
|                         | Reverse  | TTTTTGTGAGAGCATTGTCTTTAT   |              |
| DWF1 E-box4 (WT)        | Forward  | TTTTTAAAAATGCAAGTGAAGCAGG  |              |
|                         | Reverse  | TTTTTCCTGCTTCACTTGCATTTT   |              |
| DWF1 E-box5/6-e (WT)    | Forward  | TTTTTATATAACACATGTGATTAT   |              |
|                         | Reverse  | TTTTTATAAATCACATGTGTATAT   |              |
| DWF1 E-box1/2-e (MT)    | Forward  | TTTTTCTGATAAAAAAAAAATGTATA |              |
|                         | Reverse  | TTTTTATACATTTTTTTTTATCAG   |              |
| DWF1 E-box3-e (MT)      | Forward  | TTTTTATAAAGAAAAAAAACTCTCAC |              |
|                         | Reverse  | TTTTGTGAGAGTTTTTCTTTAT     |              |
| DWF1 E-box4-e (MT)      | Forward  | TTTTTAAAAATGAAAAAAAAAGCAGG |              |
|                         | Reverse  | TTTTTCCTGCTTTTTTTTCATTTT   |              |
| DWF1 E-box5/6-e (MT)    | Forward  | TTTTTATATAAAAAAAAAAATTTAT  |              |
|                         | Reverse  | TTTTTATAAATTTTTTTTTTATAT   |              |
| UBQ5-q (AT3G62250)      | Forward  | AAGGCGAAGATCCAAGACAA       | qPCR         |
|                         | Reverse  | ACTCCTCCTCAAACGCTGA        |              |
| DWF1-q (AT3G19820),     | Forward  | TCGCAAGGAACCTTGGACT        |              |
|                         | Reverse  | AACCACCATCCCACATTGTT       |              |
| DWF4-q (AT3G50660),     | Forward  | CGGAGCAAATTCTCGATCTC       |              |
|                         | Reverse  | TCTTTGAGTGCTTTGCGATG       |              |
| CPD-q (AT5G05690)       | Forward  | ATGAAAAGGAGGGAGGAGGA       |              |
|                         | Reverse  | GAGAAATTTGACGGCGAGAG       |              |
| CYP85A2-q (AT3G30180)   | Forward  | AAGCCCAACCATGATGAAAG       |              |
|                         | Reverse  | GGACCGATAGAGTCCCACA        |              |
| DWF1-semi-q (AT3G19820) | Forward  | ATGTCGGATCTTCAGACACCGCTTG  | Semi qRT-PCR |
